# Supplementary material for: Bifunctional Single-Atom Cobalt Electrocatalysts with Dense Active Sites Prepared via a Silica Xerogel Strategy for Rechargeable Zinc–Air Batteries
Source: MDPI journal article supplement (doi:10.3390/nano12030381), 2022-01-24
Supplement: s1 [file s1]

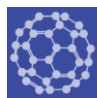

## Supplementary Materials

# Bifunctional Single-atom Cobalt Electrocatalysts with Dense Active Sites Prepared via a Silica Xerogel Strategy for Rechargeable Zinc-Air Batteries

Lijuan Wang <sup>1</sup>, Zixiang Xu <sup>1</sup>, Tingyu Peng <sup>2</sup>, Maosong Liu <sup>1,\*</sup>, Long Zhang <sup>1,\*</sup> and Jianming Zhang <sup>1,\*</sup>

<sup>1</sup> Institute of Quantum and Sustainable Technology (IQST), School of Chemistry and Chemical Engineering, Jiangsu University, Zhenjiang, 212013, China; 2211912020@stmail.ujs.edu.cn (L.W.); 3191303039@stmail.ujs.edu.cn (Z.X.)

<sup>2</sup> Instrumental Analysis Center, Jiangsu University, Zhenjiang, 212013, China; 1000005654@ujs.edu.cn

\* Correspondence: 2112012005@stmail.ujs.edu.cn (M.L.); longzhang@ujs.edu.cn (L.Z.); zhangjm@ujs.edu.cn (J.Z.)

**Keywords:** single-atom catalysts; ORR/OER; electrocatalysis; zinc-air battery; xerogel

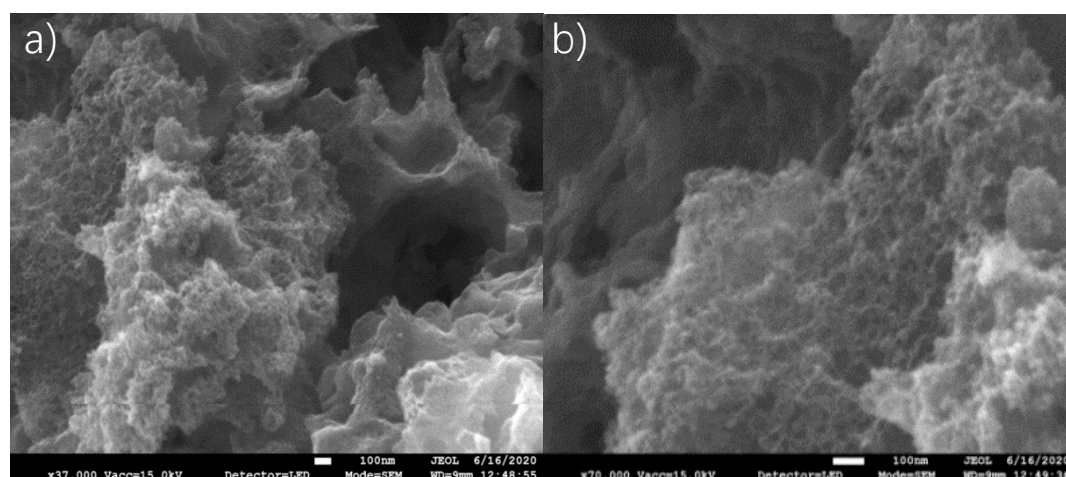

Figure S1. (a,b) SEM images of the Co-N-C SAC.

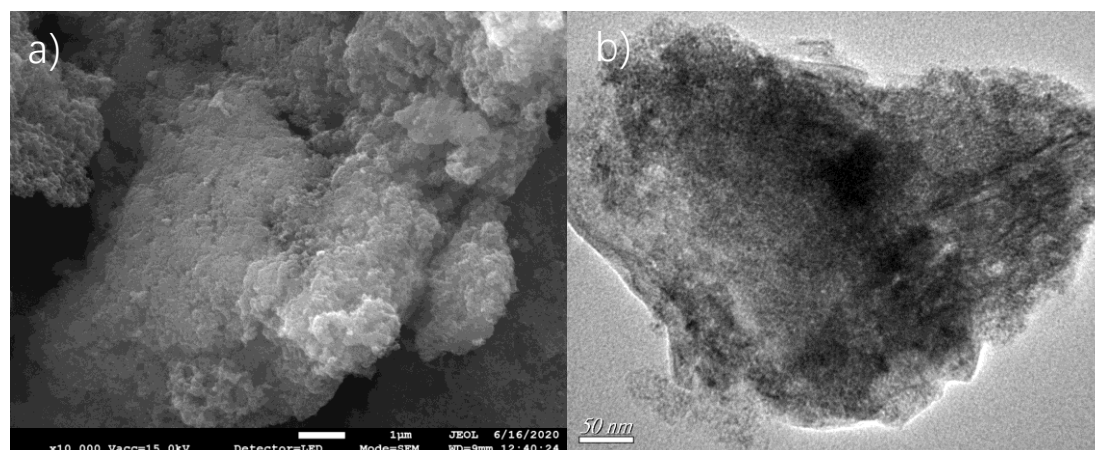

Figure S2. (a) SEM and (b) TEM images of the N-C sample.

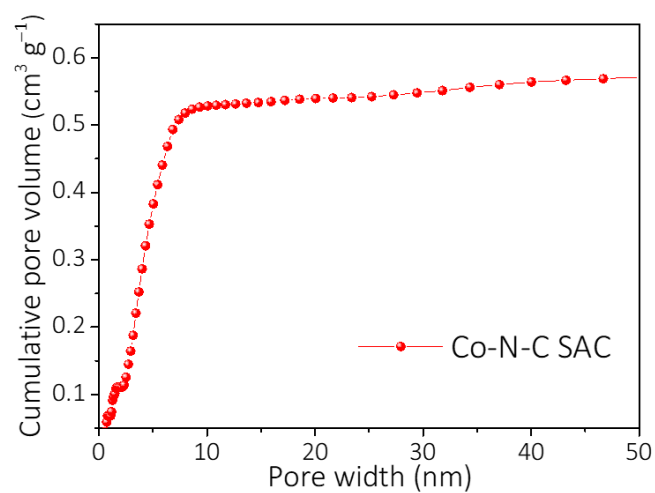

**Figure S3.** Cumulative pore volume for Co-N-C SAC.

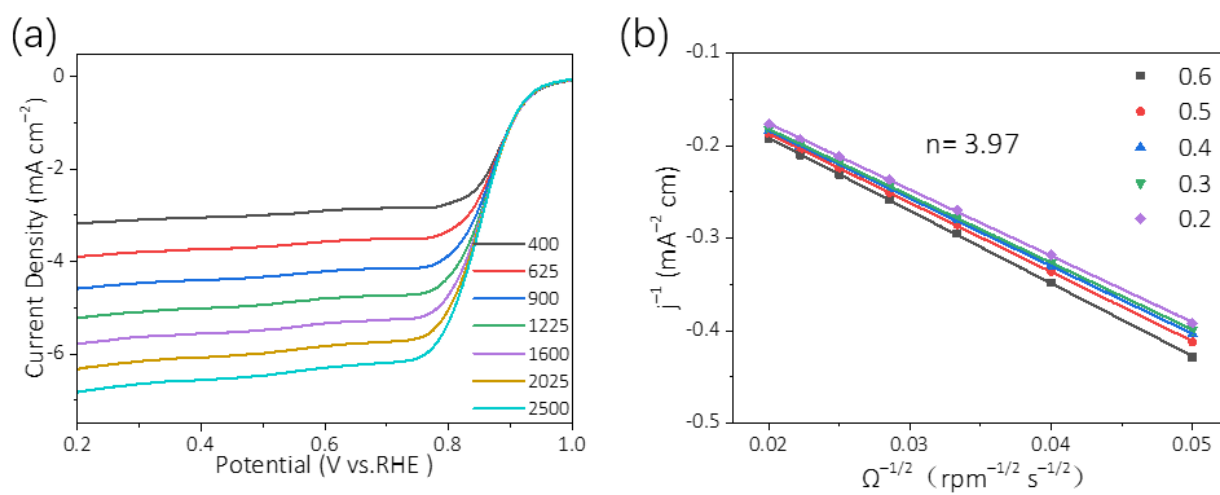

**Figure S4.** (a) ORR LSV at different rates, (b) K-L plots of Co-N-C SAC.

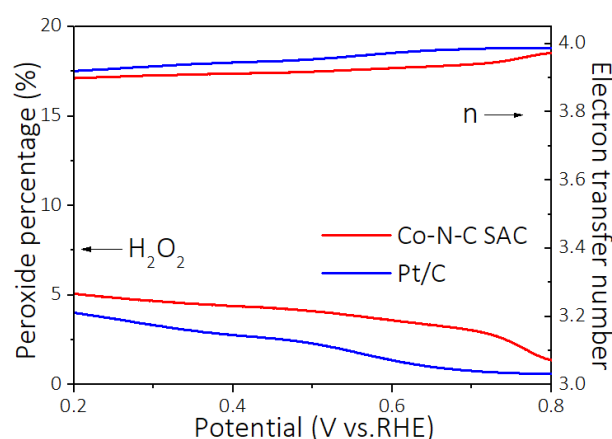

**Figure S5.** The  $\text{H}_2\text{O}_2$  yield and number of electron transfer at Co-N-C SAC and Pt/C.

**Table S1.** Mass fraction content of C, N, O and Co in Co-N-C SAC extracted from XPS measurements.

| Catalysts  | C         | N         | O        | Co       |
|------------|-----------|-----------|----------|----------|
| Co-N-C SAC | 81.62 wt% | 10.74 wt% | 3.03 wt% | 2.38 wt% |

**Table S2.** The onset potential of each catalyst in this work during ORR compared to the recent literature.

| Entry | Catalyst                                                         | $E_{\text{onset}}$ (V vs. RHE) | Reference |
|-------|------------------------------------------------------------------|--------------------------------|-----------|
| 1     | Co-N-C SAC                                                       | 1.01                           | This work |
| 2     | N-C                                                              | 0.90                           |           |
| 3     | Pt/C                                                             | 0.97                           |           |
| 4     | Co-N-OCC                                                         | 0.87                           | [1]       |
| 5     | act-Co/N/C                                                       | 0.943                          | [2]       |
| 6     | Co/VN@NC                                                         | 0.954                          | [3]       |
| 7     | Fe-NC                                                            | 0.963                          | [4]       |
| 8     | $\text{Fe}_3\text{C}/\text{Co}(\text{Fe})\text{O}_x/\text{NCNT}$ | 0.97                           | [5]       |
| 9     | Co-NHCS                                                          | 0.99                           | [6]       |
| 10    | BCNT/Co-800                                                      | 1.12                           | [7]       |

## References

- Xiang, Y.; Yang, T.; Tong, K.; Fu, T.; Tang, Y.; Liu, F.; Xiong, Z.; Si, Y.; Guo, C. Constructing flexible and self-standing electrocatalyst for oxygen reduction reaction by in situ doping nitrogen atoms into carbon cloth. *Appl. Surf. Sci.* **2020**, *523*, 146424.
- Zhu, Y.; Miyake, K.; Shu, Y.; Gabe, A.; Hirota, Y.; Uchida, Y.; Tanaka, S.; Morallón, E.; Cazorla-Amorós, D.; Nishiyama, N. Anchoring a Co/2-methylimidazole complex on ion-exchange resin and its transformation to Co/N-doped carbon as an electrocatalyst for the ORR. *Catal. Sci. Technol.* **2019**, *9*, 578–582.
- Cen, T.; Qiu, L.; Ye, Z.; Peng, X.; Liu, Y.; Yuan, D. Co/VN heterostructure coated with holey interconnected carbon frameworks as bifunctional catalysts. *Int. J. Hydrogen Energ.* **2021**, *46*, 3337–3345.
- Wang, Y.; Pan, Y.; Zhu, L.; Yu, H.; Duan, B.; Wang, R.; Zhang, Z.; Qiu, S. Solvent-free assembly of Co/Fe-containing MOFs derived N-doped mesoporous carbon nanosheets for ORR and HER. *Carbon* **2019**, *146*, 671–679.
- Wang, M.; Qian, T.; Liu, S.; Zhou, J.; Yan, C. Unprecedented Activity of Bifunctional Electrocatalyst for High Power Density Aqueous Zinc–Air Batteries. *ACS Appl. Mater. Interfaces.* **2017**, *9*, 21216–21224.
- Chen, S.; Cheng, J.; Ma, L.; Zhou, S.; Xu, X.; Zhi, C.; Zhang, W.; Zhi, L.; Zapfen, J.A. Light-weight 3D Co–N-doped hollow carbon spheres as efficient electrocatalysts for rechargeable zinc–air batteries. *Nanoscale* **2018**, *10*, 10412–10419.
- Liu, X.; Yang, W.; Chen, L.; Liu, Z.; Long, L.; Wang, S.; Liu, C.; Dong, S.; Jia, J. Graphitic Carbon Nitride (g-C<sub>3</sub>N<sub>4</sub>)-Derived Bamboo-Like Carbon Nanotubes/Co Nanoparticles Hybrids for Highly Efficient Electrocatalytic Oxygen Reduction. *ACS Appl. Mater. Interfaces.* **2020**, *12*, 4463–4472.
